# Supplementary material for: Integrating Network Pharmacology, Transcriptome and Artificial Intelligence for Investigating Into the Effect and Mechanism of Ning Fei Ping Xue Decoction Against the Acute Respiratory Distress Syndrome
Source: Front Pharmacol. 2021 Nov 3;12:731377. doi: 10.3389/fphar.2021.731377 (PMC8595141; doi:10.3389/fphar.2021.731377)
Supplement: Supplementary file 9 [file DataSheet1.CSV]

	HNFPX_LPS_Vs_LPS	HNFPX_Vs_Control	LNFPX_LPS_Vs_LPS	LPS_Vs_Control	MNFPX_LPS_Vs_LPS
HNFPX_LPS_Vs_LPS	1	0.858207439	0.838600873	-0.894196012	0.968645726
HNFPX_Vs_Control	0.858207439	1	0.7581201	-0.750280686	0.879380933
LNFPX_LPS_Vs_LPS	0.838600873	0.7581201	1	-0.719814072	0.859401944
LPS_Vs_Control	-0.894196012	-0.750280686	-0.719814072	1	-0.911106108
MNFPX_LPS_Vs_LPS	0.968645726	0.879380933	0.859401944	-0.911106108	1
